# Supplementary material for: The total dose effect of γ-ray induced domain evolution on α-In2Se3 nanoflakes
Source: Royal Society of Chemistry journal article supplement (doi:10.1039/d0cp00512f), 2020-01-01
Supplement: d0cp00512f1.pdf [file d0cp00512f1.pdf]

## The total dose effect of $\gamma$ -rays induced domain evolution on $\alpha$ - $\text{In}_2\text{Se}_3$ nanoflakes

Pengfei Hou <sup>a,b,\*</sup>, Yun Chen <sup>a,b,†</sup>, Xinhao Wang <sup>a,b,†</sup>, Yang Lv <sup>a,b</sup>, Hongxia Guo <sup>a,b</sup>, Jinbin Wang <sup>a</sup>, Xiangli Zhong <sup>a,\*</sup> and Xiaoping Ouyang <sup>a</sup>

<sup>a</sup> Key Laboratory of Low-dimensional Materials and Application Technology, School of Materials Science and Engineering, Xiangtan University, Xiangtan 411105, China

<sup>b</sup> Science and Technology on Reliability Physics and Application Technology of Electronic Component Laboratory, Guangzhou 510610, China

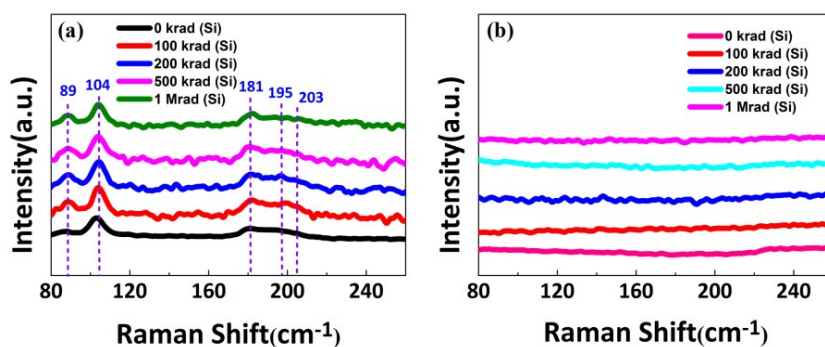

**Figure S1.** Raman spectra of the  $\alpha$ - $\text{In}_2\text{Se}_3$  covered with Au electrode and the substrates with different total radiation doses.

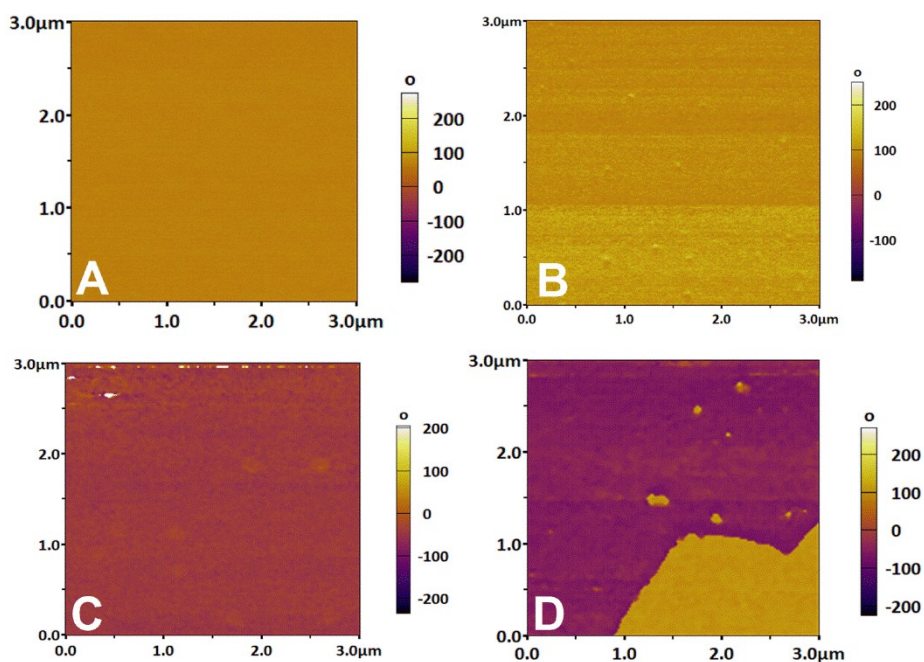

**Figure S2.** IP PFM phase images of the  $\alpha$ - $\text{In}_2\text{Se}_3$  nanoflakes after different total dose: (A) 100 krad(Si); (B) 200 krad(Si); (C) 500 krad(Si); (D) 1 Mrad(Si).

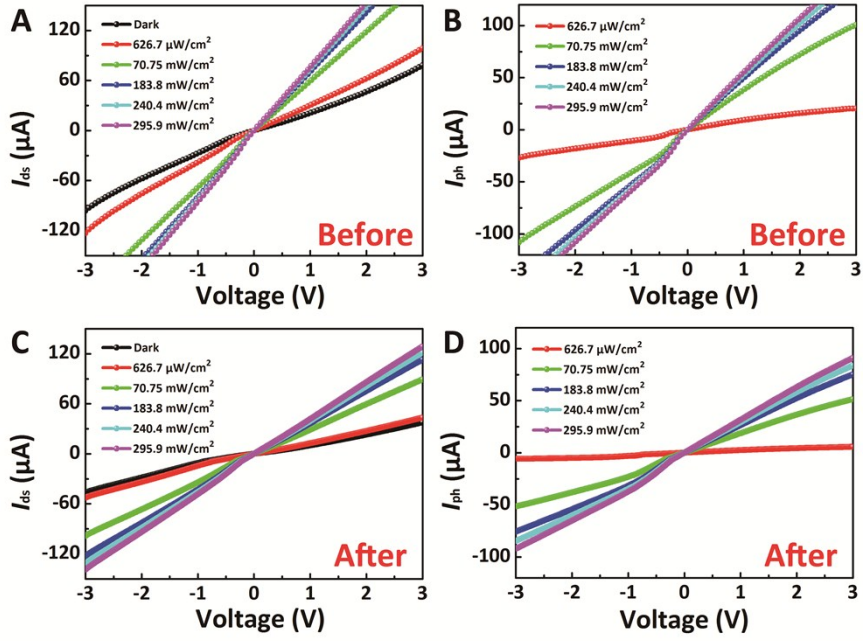

**Figure S3.** Electrical transport in  $\alpha$ -In<sub>2</sub>Se<sub>3</sub> based transistor before and after irradiation. (A) and (B) before the irradiation. (C) and (D) after the irradiation with a total dose of 200 krad(Si).

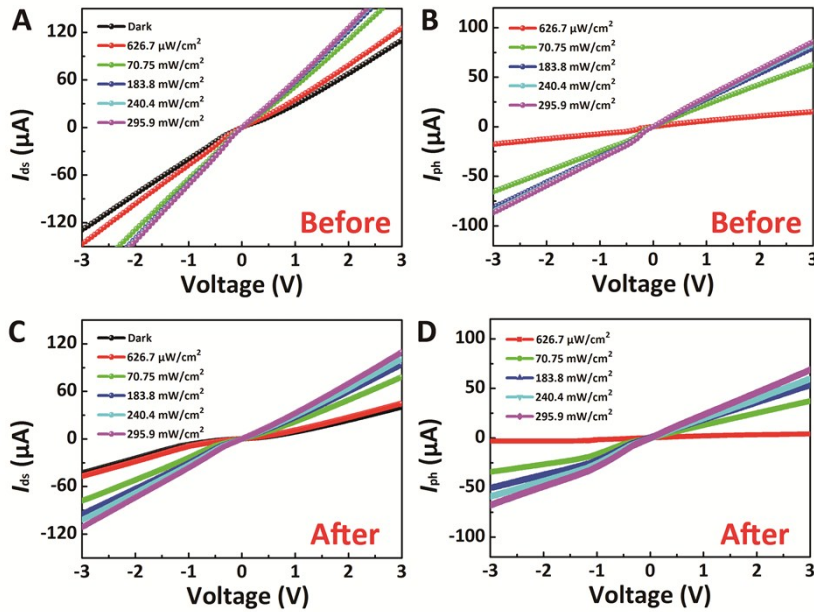

**Figure S4.** Electrical transport in  $\alpha$ -In<sub>2</sub>Se<sub>3</sub> based transistor before and after irradiation. (A) and (B) before the irradiation. (C) and (D) after the irradiation with a total dose of 500 krad(Si).

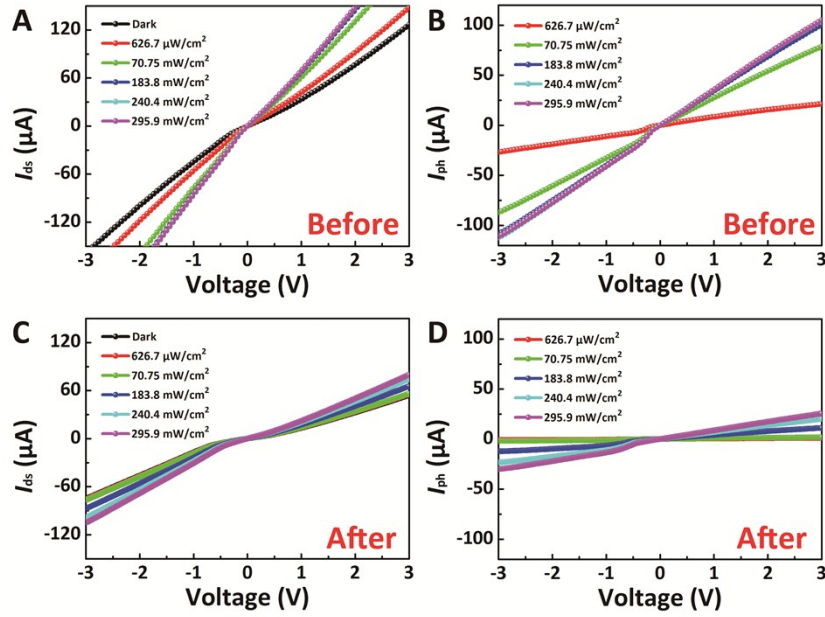

**Figure S5.** Electrical transport in  $\alpha$ - $\text{In}_2\text{Se}_3$  based transistor before and after irradiation. (A) and (B) before the irradiation. (C) and (D) after the irradiation with a total dose of 1 Mrad(Si).

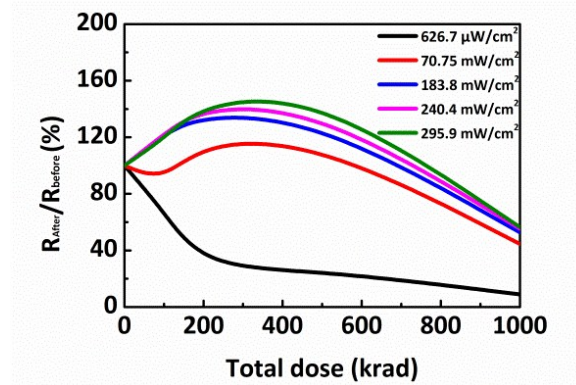

**Figure R6.** Photoresponsivity degradation ratio as a function of the total radiation dose.

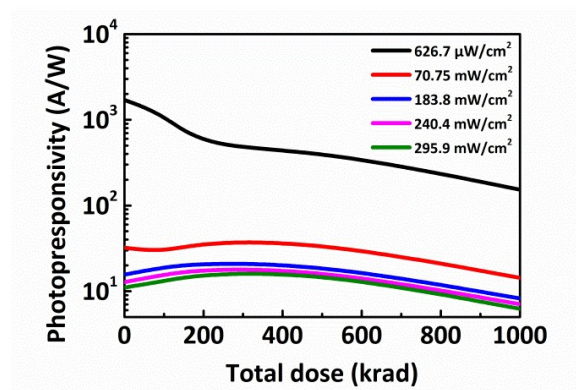

**Figure S7.** Photoresponsivity as a function of the total radiation dose.
